**P1169****Cardiac resynchronization therapy. Long term benefit**

Galizio N.; Peltzer M.; Tronconi A.; Carnero G.; Mysuta M.; Bozza A.; Gavilan L.; Labin B.; Gonzalez JL.

University Hospital. Favaloro Foundation., Capital Federal, Argentina

**Introduction:** The benefit of cardiac resynchronization therapy (CRT) in patients (pts) with left ventricular dysfunction is mainly evaluated in multicenter studies with a follow up of 6, 12 or 24 months (m).

**Objectives:** To describe the response of pts implanted with a CRT-D/P, from a single center prospective registry, at 12, 24, 36 and 48 m.

**Methods:** Between June 2009 and June 2018, 381 pts implanted with CRT-D/P were followed at 12, 24, 36 and 48 m. Indications were performed according to international guidelines. Primary prevention: 335 pts (88%). The A-V and V-V delay were programmed according to the results of Cardiac Doppler after implantation and when it was necessary. All pts had an out patient control and 10% remote monitoring control. The pts were considered Responders: decrease  $\geq 1$  FC NYHA or increase LVEF  $\geq 5\%$  (absolute), Super-Responders: increase LVEF  $\geq 10\%$  (absolute) and with LVEF normalization: LVEF  $\geq 50\%$ . Baseline characteristics: Age  $64 \pm 11$  years, men 268 p (70%), ischemic cardiomyopathy 144 pts (38%), nonischemic cardiomyopathy 237 (62%), FC II-III NYHA 341 p (90%), LBBB 246 p (72%), mean QRSD  $165 \pm 27$ ms, mean LVDD  $68 \pm 10$ mm, mean LVSD  $56 \pm 12$ mm, and mean LVEF  $24 \pm 9\%$ . Pts were on  $\beta$ -blockers (93%), ACEi/ARBs (90%), mineral receptor blockers (83%) and diuretics (73%).

**Results:** Responders: 227/276 pts (82%) at 12 m, 184/224 pts (82%) at 24 m, 141/180 p (78%) at 36 m and 112/137 (82%) at 48 m. Super-Responders: 92/186 pts (49%) at 12 m, 92/172 pts (53%) at 24 m, 71/128 (55%) at 36 m and 66/116 (57%) at 48 m. LVEF normalization: 22/186 pts (12%) at 12 m, 31/172 pts (18%) at 24 m, 24/128 pts (19%) at 36 m and 23/116 pts (20%) at 48 m.

**Conclusion:** In our study population, pts with CRT-D/P implanted according to an appropriate indication, programming and follow up, with in-office and/or remote monitoring control, showed an elevated percentage of Responders, Super-Responders and LVEF normalization. The benefit was sustained or even increased over time.
